# Supplementary material for: Molecular and Phenotypic Data Support the Recognition of the Wakatobi Flowerpecker (Dicaeum kuehni) from the Unique and Understudied Sulawesi Region
Source: PLoS One. 2014 Jun 4;9(6):e98694. doi: 10.1371/journal.pone.0098694 (PMC4045762; doi:10.1371/journal.pone.0098694)
Supplement: Table S1 — Accession numbers of sequences used in this study’s phylogenetic analyses. (XLSX) [file pone.0098694.s001.xlsx]

## Sheet: Summary Accession Numbers
		TABLE S1. Accession numbers of sequences used in this study's phylogenetic analyses
Genus	Species	COI Accession Numbers	ND3 Accession Numbers
Dicaeum	aeneum	FJ473228	GQ145243[accn]
Dicaeum	agile		GQ145264
Dicaeum	anthonyi		GQ145241
Dicaeum	aureolimbatum	FJ473172	GQ145246[accn]
Dicaeum	australe	FJ473059	GU816805; GQ145263
Dicaeum	bicolor		GQ145242
Dicaeum	celebicum	JX067922; GQ145247	JX067913	[accn]
Dicaeum	chrysorrheum		GQ145235
Dicaeum	concolor		GQ145255
Dicaeum	cruentatum		GQ145236
Dicaeum	everetti		GQ145265
Dicaeum	eximium	JQ174684:JQ174685[accn]	GQ145261
Dicaeum	geelvinkianum		GQ145237
Dicaeum	hirundinaceum	FJ473233	GQ145225
Dicaeum	hypoleucum	FJ473237	GQ145244
Dicaeum	igniferum		GQ145245
Dicaeum	ignipectus		GQ145262
Dicaeum	kuehni	JX067916:JX067921[accn]; JX067923:JX067924[accn]	JX067909:JX0679012[accn]; JX067914:JX067915[accn]
Dicaeum	melanoxanthum		GQ145228
Dicaeum	monticolum		GQ145257
Dicaeum	nigrilore		GQ145254
Dicaeum	pygmaeum	JQ174686	GQ145260
Dicaeum	sanguinolentum		GQ145239
Dicaeum	trigonostigma	FJ473089; FJ473098; FJ473101; FJ473105; FJ473076; FJ473093; FJ473142; EU541455	GQ145224
Dicaeum	tristrami		GQ145258
Nectarinia	adelberti		AY233991
Nectarinia	alinae		AY233992
Nectarinia	bouvieri		AY233993
Nectarinia	erythrocerca		AY233994
Nectarinia	jugularis	FJ473077:FJ473078[accn]; FJ473099; FJ473158; FJ473162:FJ473163[accn]; FJ473171; FJ473187:FJ473188[accn]; FJ473190; FJ473199	GQ145229; AY233995
Nectarinia	kilimensis		AY233996
Nectarinia	minulla		AY233997
Nectarinia	olivacea	FJ473232	AY233998; JF956832; GU816806
Nectarinia	senegalensis		AY233999
Nectarinia	sperata	EU541459	JF956833
Nectarinia	talatala	FJ473229	AY234000
Nectarinia	venusta		AY234001
